# Supplementary material for: Who Is Spreading Avian Influenza in the Moving Duck Flock Farming Network of Indonesia?
Source: PubMed Central journal article supplement (PMC4809517; doi:10.1371/journal.pone.0152123), 2016-03-28
Supplement: pone.0152123.s001.pdf [file pone.0152123.s001.pdf]

# MOVING DUCKS IN CENTRAL JAVA INDONESIA

## MONTHLY QUESTIONNAIRE

Farm  
reference  
number:

Date of interview:

|                                                                              |          |
|------------------------------------------------------------------------------|----------|
| Current location of moving duck flock:<br>village, sub-district and province |          |
| Current location of moving duck flock:<br>GPS readings                       | S:<br>E: |

### Information on moving duck flock structure, movements, scavenging and sales

1. How many moving duck flocks do you have **TODAY**? For each flock outline the number of ducks, the breed, the age, the vaccination status and the proposed date of AI vaccination.

*M=Male, F=Female*

| Duck group number | Number | Breed | Age today | AI vac already           |                          | Date of AI vaccination (first) | Date of AI vaccination (booster) | Location where AI vaccinated |
|-------------------|--------|-------|-----------|--------------------------|--------------------------|--------------------------------|----------------------------------|------------------------------|
|                   |        |       |           | Yes                      | No                       |                                |                                  |                              |
| 1 M               |        |       |           | <input type="checkbox"/> | <input type="checkbox"/> |                                |                                  |                              |
| 1 F               |        |       |           | <input type="checkbox"/> | <input type="checkbox"/> |                                |                                  |                              |
| 2 M               |        |       |           | <input type="checkbox"/> | <input type="checkbox"/> |                                |                                  |                              |
| 2 F               |        |       |           | <input type="checkbox"/> | <input type="checkbox"/> |                                |                                  |                              |
| 3 M               |        |       |           | <input type="checkbox"/> | <input type="checkbox"/> |                                |                                  |                              |
| 3 F               |        |       |           | <input type="checkbox"/> | <input type="checkbox"/> |                                |                                  |                              |

2. Use the calendar provided to check/specify the location of the moving duck flock on a daily basis since the last sampling. Use a **location reference letter** in the calendar and below. Ensure all dates are filled in. List details for each location reference letter below.

| Location reference letter | From which date | Until which date | District | Sub-district | Village | Sub-village | Reason for being at this location | List name of rice paddy owner |
|---------------------------|-----------------|------------------|----------|--------------|---------|-------------|-----------------------------------|-------------------------------|
| A                         |                 |                  |          |              |         |             |                                   |                               |
| B                         |                 |                  |          |              |         |             |                                   |                               |
| C                         |                 |                  |          |              |         |             |                                   |                               |
| D                         |                 |                  |          |              |         |             |                                   |                               |
| E                         |                 |                  |          |              |         |             |                                   |                               |
| F                         |                 |                  |          |              |         |             |                                   |                               |

3. Indicate all locations of the moving duck flock since the last sampling on the map. Use the same **location reference letter** above. Please tick the box when completed.

Comments by farmer on any of these questions:

4. Specify the type of transport you used to move the ducks to each location.

| Location ref. letter | Type of transport | Vehicle disinfection before transport |                          |                          | N of people involved in transport | Transport shared with other flocks. Specify N flocks. | Name of transport owner |
|----------------------|-------------------|---------------------------------------|--------------------------|--------------------------|-----------------------------------|-------------------------------------------------------|-------------------------|
|                      |                   | Yes                                   | No                       | Don't know               |                                   |                                                       |                         |
| A                    |                   | <input type="checkbox"/>              | <input type="checkbox"/> | <input type="checkbox"/> |                                   | <input type="checkbox"/> .....                        |                         |
| B                    |                   | <input type="checkbox"/>              | <input type="checkbox"/> | <input type="checkbox"/> |                                   | <input type="checkbox"/> .....                        |                         |
| C                    |                   | <input type="checkbox"/>              | <input type="checkbox"/> | <input type="checkbox"/> |                                   | <input type="checkbox"/> .....                        |                         |
| D                    |                   | <input type="checkbox"/>              | <input type="checkbox"/> | <input type="checkbox"/> |                                   | <input type="checkbox"/> .....                        |                         |
| E                    |                   | <input type="checkbox"/>              | <input type="checkbox"/> | <input type="checkbox"/> |                                   | <input type="checkbox"/> .....                        |                         |
| F                    |                   | <input type="checkbox"/>              | <input type="checkbox"/> | <input type="checkbox"/> |                                   | <input type="checkbox"/> .....                        |                         |

5. Specify the type of scavenging areas used and the number of duck flocks sharing each scavenging location.

| Location ref. letter | Rice fields              | River banks              | Crops of other kind (specify)  | N of duck flocks sharing this area |                   |
|----------------------|--------------------------|--------------------------|--------------------------------|------------------------------------|-------------------|
|                      |                          |                          |                                | From your group                    | Other duck flocks |
| A                    | <input type="checkbox"/> | <input type="checkbox"/> | <input type="checkbox"/> ..... |                                    |                   |
| B                    | <input type="checkbox"/> | <input type="checkbox"/> | <input type="checkbox"/> ..... |                                    |                   |
| C                    | <input type="checkbox"/> | <input type="checkbox"/> | <input type="checkbox"/> ..... |                                    |                   |
| D                    | <input type="checkbox"/> | <input type="checkbox"/> | <input type="checkbox"/> ..... |                                    |                   |
| E                    | <input type="checkbox"/> | <input type="checkbox"/> | <input type="checkbox"/> ..... |                                    |                   |
| F                    | <input type="checkbox"/> | <input type="checkbox"/> | <input type="checkbox"/> ..... |                                    |                   |

6. What arrangements do you have with the rice field owner to have your birds scavenging there? Please indicate how much money you have to pay for what period of scavenging (per month, per 2 months etc.) and for what size of the scavenging area (in ha).

7. Specify the type, amount and the source of additional feed used and the type of confinements (material, size of area etc.) used at each location.

| Location ref. letter | Additional feed |                      |                         | Type of confinement |       |
|----------------------|-----------------|----------------------|-------------------------|---------------------|-------|
|                      | Type of feed    | Amount given per day | When and where obtained | Day                 | Night |
| A                    |                 |                      |                         |                     |       |
| B                    |                 |                      |                         |                     |       |
| C                    |                 |                      |                         |                     |       |
| D                    |                 |                      |                         |                     |       |
| E                    |                 |                      |                         |                     |       |
| F                    |                 |                      |                         |                     |       |

8. Did your moving ducks share any scavenging areas or had contact any other animals or people since the last sampling? Please indicate the frequency and the when the contact occurred.

|                                                     | Often                    | Some times               | Seldom                   | Never                    | Please indicate what time of day or night |
|-----------------------------------------------------|--------------------------|--------------------------|--------------------------|--------------------------|-------------------------------------------|
| Other ducks                                         | <input type="checkbox"/> | <input type="checkbox"/> | <input type="checkbox"/> | <input type="checkbox"/> |                                           |
| Chickens                                            | <input type="checkbox"/> | <input type="checkbox"/> | <input type="checkbox"/> | <input type="checkbox"/> |                                           |
| Geese                                               | <input type="checkbox"/> | <input type="checkbox"/> | <input type="checkbox"/> | <input type="checkbox"/> |                                           |
| Wild birds (specify) .....                          | <input type="checkbox"/> | <input type="checkbox"/> | <input type="checkbox"/> | <input type="checkbox"/> |                                           |
| Other poultry (specify) .....                       | <input type="checkbox"/> | <input type="checkbox"/> | <input type="checkbox"/> | <input type="checkbox"/> |                                           |
| Dogs                                                | <input type="checkbox"/> | <input type="checkbox"/> | <input type="checkbox"/> | <input type="checkbox"/> |                                           |
| Cats                                                | <input type="checkbox"/> | <input type="checkbox"/> | <input type="checkbox"/> | <input type="checkbox"/> |                                           |
| Water buffalos                                      | <input type="checkbox"/> | <input type="checkbox"/> | <input type="checkbox"/> | <input type="checkbox"/> |                                           |
| Other animals (specify) .....                       |                          |                          |                          |                          |                                           |
| People other than those working with the duck flock | <input type="checkbox"/> | <input type="checkbox"/> | <input type="checkbox"/> | <input type="checkbox"/> |                                           |

**Comments by farmer on any of these questions:**

9. When are your ducks scavenging **today**? *Indicate details for each group and scavenging session.*

| Duck group number | Session | Start time | Finish time | Type of supervision      |                          |                          |                          |                                |
|-------------------|---------|------------|-------------|--------------------------|--------------------------|--------------------------|--------------------------|--------------------------------|
|                   |         |            |             | When moving to area      | While scavenging         | When returning from area | No supervision           | Other (specify)                |
| 1                 | 1       |            |             | <input type="checkbox"/> | <input type="checkbox"/> | <input type="checkbox"/> | <input type="checkbox"/> | <input type="checkbox"/> ..... |
|                   | 2       |            |             | <input type="checkbox"/> | <input type="checkbox"/> | <input type="checkbox"/> | <input type="checkbox"/> | <input type="checkbox"/> ..... |
| 2                 | 1       |            |             | <input type="checkbox"/> | <input type="checkbox"/> | <input type="checkbox"/> | <input type="checkbox"/> | <input type="checkbox"/> ..... |
|                   | 2       |            |             | <input type="checkbox"/> | <input type="checkbox"/> | <input type="checkbox"/> | <input type="checkbox"/> | <input type="checkbox"/> ..... |
| 3                 | 1       |            |             | <input type="checkbox"/> | <input type="checkbox"/> | <input type="checkbox"/> | <input type="checkbox"/> | <input type="checkbox"/> ..... |
|                   | 2       |            |             | <input type="checkbox"/> | <input type="checkbox"/> | <input type="checkbox"/> | <input type="checkbox"/> | <input type="checkbox"/> ..... |

10. Were any ducks sold or given away since the last sampling? *If yes, give the details below.*

| Date | Number |            | Age | To whom? | Location to where sold or given away | Transport to sale/given away location | Sale price per duck |
|------|--------|------------|-----|----------|--------------------------------------|---------------------------------------|---------------------|
|      | sold   | given away |     |          |                                      |                                       |                     |
|      |        |            |     |          |                                      |                                       |                     |
|      |        |            |     |          |                                      |                                       |                     |
|      |        |            |     |          |                                      |                                       |                     |
|      |        |            |     |          |                                      |                                       |                     |

11. Did you try to sell (or give away) ducks, but returned with unsold ducks? Yes          No

*If yes, give details below, i.e. indicate how many, why and what was done with these birds.*

**Information on egg production and hatching**

12. How many eggs were laid since the last sampling? *For duck group refer to question 1.*

| Duck group number (Q1) | Number of eggs laid |
|------------------------|---------------------|
| 1                      |                     |
| 2                      |                     |
| 3                      |                     |

13. Did you lose eggs to different causes since the last sampling?

Yes                                  No

*If yes, please indicate causes and the number of eggs lost by each cause below.*

| Predators | Theft | Other (specify) | Unknown |
|-----------|-------|-----------------|---------|
| .....     | ..... | .....           | .....   |

14. Have you observed poor egg shell quality since the last sampling?

Yes                                  No

15. Were any eggs sold or given away since the last sampling? *If yes, give the details below.*

| Date | Number |            | Location to where sold or given away | Transport to sale/given away location | Sale price per egg |
|------|--------|------------|--------------------------------------|---------------------------------------|--------------------|
|      | sold   | given away |                                      |                                       |                    |
|      |        |            |                                      |                                       |                    |
|      |        |            |                                      |                                       |                    |
|      |        |            |                                      |                                       |                    |

16. Did you try to sell (or give away) eggs, but returned with unsold eggs? Yes          No

*If yes, give details below i.e. indicate how many, why and what was done with these unsold eggs.*

**Comments by farmer on any of these questions:**

17. Since the last sampling did you had eggs incubating and did you had any hatchings? *If yes, please give details below.*

| Location<br>( <i>details and if home</i> ) | Species and breed | Number incubating | Method of incubation | Source of fertile eggs   |                          | Details on incubator | Specify N hatched and what was done with the hatched ducklings? |
|--------------------------------------------|-------------------|-------------------|----------------------|--------------------------|--------------------------|----------------------|-----------------------------------------------------------------|
|                                            |                   |                   |                      | Home laid                | Bought                   |                      |                                                                 |
|                                            |                   |                   |                      | <input type="checkbox"/> | <input type="checkbox"/> |                      |                                                                 |
|                                            |                   |                   |                      | <input type="checkbox"/> | <input type="checkbox"/> |                      |                                                                 |

**Information on purchases**

18. Were ducks purchased or given to you since the last sampling? *Please give details below.*

| Date | Breed | Number |       | Age when obtained | From whom? | Location obtained | Transport to flock | Price per duck | HPAI vaccinated          |                          |                          |
|------|-------|--------|-------|-------------------|------------|-------------------|--------------------|----------------|--------------------------|--------------------------|--------------------------|
|      |       | bought | given |                   |            |                   |                    |                | Yes                      | No                       | Don't know               |
|      |       |        |       |                   |            |                   |                    |                | <input type="checkbox"/> | <input type="checkbox"/> | <input type="checkbox"/> |
|      |       |        |       |                   |            |                   |                    |                | <input type="checkbox"/> | <input type="checkbox"/> | <input type="checkbox"/> |
|      |       |        |       |                   |            |                   |                    |                | <input type="checkbox"/> | <input type="checkbox"/> | <input type="checkbox"/> |
|      |       |        |       |                   |            |                   |                    |                | <input type="checkbox"/> | <input type="checkbox"/> | <input type="checkbox"/> |
|      |       |        |       |                   |            |                   |                    |                | <input type="checkbox"/> | <input type="checkbox"/> | <input type="checkbox"/> |

19. How were new purchased or given ducks incorporated into the flocks?

| Separate initially<br>(specify how long and where) | Mix immediately          | Other (specify)                |
|----------------------------------------------------|--------------------------|--------------------------------|
| <input type="checkbox"/> .....                     | <input type="checkbox"/> | <input type="checkbox"/> ..... |

20. Were any eggs purchased or given to you since the last sampling? *If yes give the details below.*

| Date | Number |       | Location obtained | Transport to farm | Price per egg | Purpose of eggs |          |
|------|--------|-------|-------------------|-------------------|---------------|-----------------|----------|
|      | bought | given |                   |                   |               | eating          | hatching |
|      |        |       |                   |                   |               |                 |          |
|      |        |       |                   |                   |               |                 |          |
|      |        |       |                   |                   |               |                 |          |
|      |        |       |                   |                   |               |                 |          |

**Information on duck health**

21. Did you have any ducks deaths in your moving duck flock since the last sampling? *If yes, give details in the table below. For duck group refer to question 1.*

| Date | From which duck group (Q1) | Age at death | Number dying | Symptoms observed |
|------|----------------------------|--------------|--------------|-------------------|
|      |                            |              |              |                   |
|      |                            |              |              |                   |
|      |                            |              |              |                   |

22. What was done with the carcasses of the dead ducks? *Tick one or more boxes of the following.*

|                         |  |                      |  |
|-------------------------|--|----------------------|--|
| Burned                  |  | Buried               |  |
| Sold                    |  | Eaten                |  |
| Processed for fish feed |  | Thrown away          |  |
| Nothing-just left there |  | Other (specify)..... |  |

23. Did you have any ducks with sickness but not death in your flocks since the last sampling? *If yes, please give details below.*

| Date | Number of ducks | Age | Symptoms observed |
|------|-----------------|-----|-------------------|
|      |                 |     |                   |
|      |                 |     |                   |
|      |                 |     |                   |

**Comments by farmer on any of these questions:**

24. How were these sick ducks treated? *Specify date from question 23 and provide details.*

| Date<br>(from Q 23) | Separated from flock |    | Medications given  |                         |
|---------------------|----------------------|----|--------------------|-------------------------|
|                     | Yes                  | No | Type of medication | Route of administration |
|                     |                      |    |                    |                         |
|                     |                      |    |                    |                         |

25. Did you have your moving ducks vaccinated against any of the diseases specified below? *If yes, please provide details on the vaccination.*

| Vaccine                  | Vaccinated               | Date of vaccination | Location where vaccinated | Person administering vaccine |
|--------------------------|--------------------------|---------------------|---------------------------|------------------------------|
| Duck plague              | <input type="checkbox"/> |                     |                           |                              |
| Pasteurella              | <input type="checkbox"/> |                     |                           |                              |
| Other (specify)<br>..... | <input type="checkbox"/> |                     |                           |                              |

26. Have you seen any dead birds along the way?  Yes  No

*If yes, please provide details on the dead birds (location, type of birds, number of dead birds, breed of dead birds etc.).*

|  |
|--|
|  |
|--|

**Information on people with contact to ducks**

27. How many people or workers are currently working with the moving ducks including you?

|  |
|--|
|  |
|--|

28. Did any of these people or workers visit villages or towns during the journey? *If yes, give details on reason for visiting, and what happens with the ducks at this time.*

| Village and sub-village | Reason for visiting | Duck management during visit |
|-------------------------|---------------------|------------------------------|
|                         |                     |                              |
|                         |                     |                              |
|                         |                     |                              |

29. Did any of these people or workers visit any other places since the sampling? *Tick one or more boxes of the following.*

| Other duck flocks | Other chicken flocks | Markets | Cock fights | Other (specify) | Don't know |
|-------------------|----------------------|---------|-------------|-----------------|------------|
|                   |                      |         |             | .....           |            |

30. Did anyone else visit your moving flock since the sampling? *Tick one box per row. If you ticked yes specify the frequency and details of this visit.*

|                                  | Yes | No | Don't know | Frequency and details on visits |
|----------------------------------|-----|----|------------|---------------------------------|
| DINAS person/veterinarian        |     |    |            |                                 |
| Poultry trader                   |     |    |            |                                 |
| Egg trader                       |     |    |            |                                 |
| Manure trader                    |     |    |            |                                 |
| Poultry farmers                  |     |    |            |                                 |
| Other farmers (specify)<br>..... |     |    |            |                                 |
| Delivery person                  |     |    |            |                                 |
| Other (specify)<br>.....         |     |    |            |                                 |

31. Did you keep a dog with your moving duck flock?  Yes  No

**Comments by farmer on any of these questions:**
